# Supplementary material
Source: publisher figshare collection journal article supplement (https://frontiersin.figshare.com/ndownloader/files/26401273)
Supplement: Supplementary file [file 26401273]

**UCLA Loneliness Measure (Short 8-item version; Roberts, Lewinsohn, and Seeley 1993)**

For each statement below, please indicate how often you feel the way described.

1. I feel in tune with people around me. (R)
2. I lack companionship.
3. I am an outgoing person. (R)
4. I feel left out.
5. I feel isolated from others.
6. I can find companionship when I want to. (R)
7. I am unhappy being so withdrawn.
8. People are around me but not with me.

1 = Never; 2 = Rarely; 3 = Sometimes; 4 = Most of the time; 5 = Always

**COVID-19 FOMO (Adapted from Przybylski, A. K., Murayama, K., DeHaan, C. R., & Gladwell, V. 2013)**

1. I'm worried my friends will have video chats without me.
2. I wonder if I spend too much time on my phone trying to keep up with what is going on.
3. When I have a good time it is important for me to share the details online (e.g. updating status).

1 = Strongly Disagree; 5 = Strongly Agree.

**Ten-item personality measure (TIPI; Gosling, S. D., Rentfrow, P. J., & Swann, W. B. 2003).**

Here are a number of personality traits that may or may not apply to you. Please write a number next to each statement to indicate the extent to which you agree or disagree with that statement. You should rate the extent to which the pair of traits applies to you, even if one characteristic applies more strongly than the other.

1 = Disagree strongly; 7 = Agree strongly

I see myself as:

1. \_\_\_\_\_ Extraverted, enthusiastic.
2. \_\_\_\_\_ Critical, quarrelsome.
3. \_\_\_\_\_ Dependable, self-disciplined.
4. \_\_\_\_\_ Anxious, easily upset.
5. \_\_\_\_\_ Open to new experiences, complex.
6. \_\_\_\_\_ Reserved, quiet.
7. \_\_\_\_\_ Sympathetic, warm.
8. \_\_\_\_\_ Disorganized, careless.
9. \_\_\_\_\_ Calm, emotionally stable.
10. \_\_\_\_\_ Conventional, uncreative.

TIPI scale scoring ("R" denotes reverse-scored items):

Extraversion: 1, 6R; Agreeableness: 2R, 7; Conscientiousness: 3, 8R; Emotional Stability: 4R, 9; Openness to Experiences: 5, 10R.

## Sample Demographic Information

|                           | Argentina<br>(n=96) | Italy<br>(n=89)   | UK<br>(n=149)     | Overall<br>(n=334) |
|---------------------------|---------------------|-------------------|-------------------|--------------------|
| <b>Age</b>                |                     |                   |                   |                    |
| Mean (SD)                 | 21.5 (1.77)         | 22.2 (1.89)       | 21.0 (2.16)       | 21.5 (2.03)        |
| Median [Min, Max]         | 22.0 [18.0, 25.0]   | 22.0 [18.0, 26.0] | 21.0 [18.0, 26.0] | 22.0 [18.0, 26.0]  |
| <b>Gender</b>             |                     |                   |                   |                    |
| female                    | 69 (71.9%)          | 53 (59.6%)        | 109 (73.2%)       | 231 (69.2%)        |
| male                      | 27 (28.1%)          | 35 (39.3.1%)      | 39 (26.2%)        | 101 (30.2%)        |
| other                     | 0 (0%)              | 1 (1.1%)          | 1 (0.7%)          | 2 (0.6%)           |
| <b>Do you have a job?</b> |                     |                   |                   |                    |
| No                        | 47 (49.0%)          | 61 (68.5%)        | 66 (44.3%)        | 174 (52.1%)        |
| Yes, part-time            | 38 (39.6%)          | 18 (20.2%)        | 37 (24.8%)        | 93 (27.8%)         |
| Yes, full-time            | 11 (11.5%)          | 10 (11.2%)        | 46 (30.9%)        | 67 (20.1%)         |
| <b>Do you have a pet?</b> |                     |                   |                   |                    |
| No                        | 45 (46.9%)          | 44 (49.4%)        | 62 (41.6%)        | 151 (45.2%)        |
| Yes                       | 51 (53.1%)          | 45 (50.6%)        | 87 (58.4%)        | 183 (54.8%)        |
| <b>Living Situation</b>   |                     |                   |                   |                    |
| With someone              | 93 (96.9%)          | 89 (100%)         | 141 (94.6%)       | 323 (96.7%)        |
| Alone                     | 3 (3.1%)            | 0 (0%)            | 8 (5.4%)          | 11 (3.3%)          |

## Mediation Model (Social Networking Apps Usage) with Country Fixed Effects, Personality Scores and Gender as Covariates

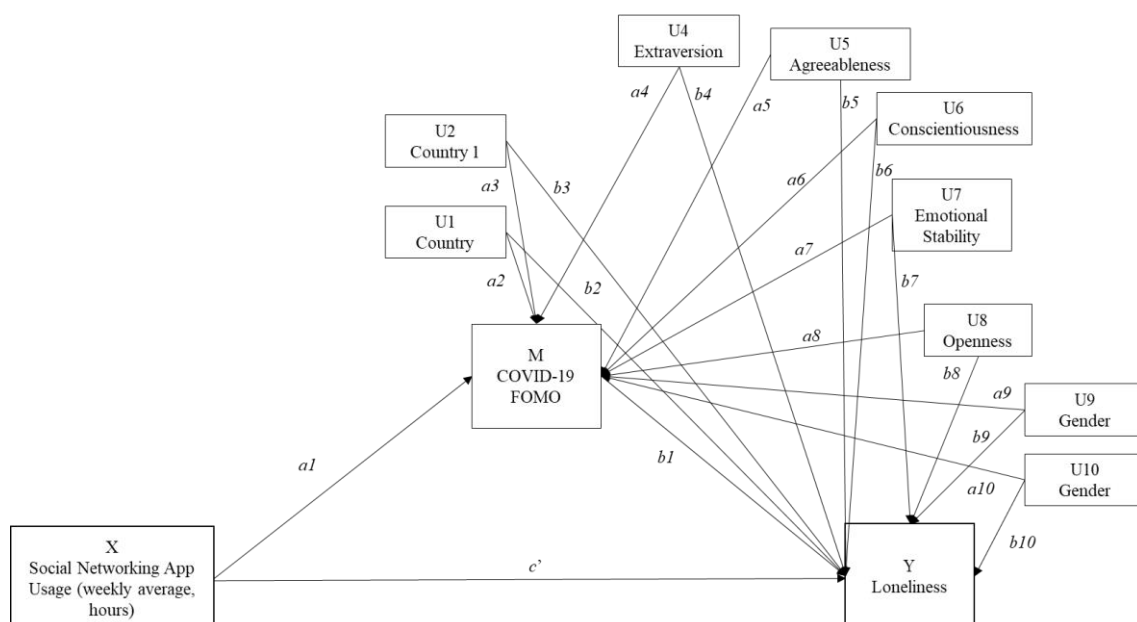

## Model Results

| MEDIATION RESULTS                                                            |              |              |               |              |
|------------------------------------------------------------------------------|--------------|--------------|---------------|--------------|
| Model-Path Estimates                                                         |              |              |               |              |
|                                                                              | Coefficient  | SE           | z             | p            |
| <b>a1</b>                                                                    | <b>.0010</b> | <b>.0004</b> | <b>2.416</b>  | <b>.016</b>  |
| a2                                                                           | .102         | .123         | .834          | .404         |
| <b>a3</b>                                                                    | <b>.309</b>  | <b>.123</b>  | <b>2.939</b>  | <b>.003</b>  |
| a4                                                                           | .027         | .033         | .824          | .410         |
| a5                                                                           | -.029        | .043         | -.668         | .504         |
| a6                                                                           | -.022        | .041         | -.542         | .588         |
| <b>a7</b>                                                                    | <b>-.122</b> | <b>.031</b>  | <b>-3.897</b> | <b>.000</b>  |
| a8                                                                           | .027         | .049         | .551          | .582         |
| a9                                                                           | -.181        | .095         | -1.902        | .057         |
| <b>a10</b>                                                                   | <b>.868</b>  | <b>.343</b>  | <b>2.532</b>  | <b>.011</b>  |
| <b>b1</b>                                                                    | <b>.131</b>  | <b>.030</b>  | <b>4.289</b>  | <b>.0000</b> |
| <b>b2</b>                                                                    | <b>.147</b>  | <b>.069</b>  | <b>2.131</b>  | <b>.033</b>  |
| <b>b3</b>                                                                    | <b>.350</b>  | <b>.056</b>  | <b>6.280</b>  | <b>.0000</b> |
| <b>b4</b>                                                                    | <b>-.185</b> | <b>.019</b>  | <b>-9.793</b> | <b>.0000</b> |
| <b>b5</b>                                                                    | <b>-.067</b> | <b>.021</b>  | <b>-3.166</b> | <b>.002</b>  |
| b6                                                                           | -.013        | .019         | -.667         | .505         |
| <b>b7</b>                                                                    | <b>-.113</b> | <b>.018</b>  | <b>-6.295</b> | <b>.0000</b> |
| b8                                                                           | -.039        | .024         | -1.624        | .104         |
| b9                                                                           | -.053        | .057         | -.929         | .353         |
| b10                                                                          | -.246        | .524         | -.470         | .638         |
| c'                                                                           | .0001        | .002         | .580          | .562         |
| Indirect Effect (with Bootstrap 95% Confidence Interval and Standard Errors) |              |              |               |              |
|                                                                              | Effect       | LL 95%CI     | UL 95% CI     | SE           |
| <b>X → M → Y*</b>                                                            | <b>.001</b>  | <b>.000</b>  | <b>.003</b>   | <b>.001</b>  |

*Note*— 5,000 bootstraps. Bolded paths are significant; \*  $p = .069$

## Mediation Model (Messaging and VoIP Apps Usage) with Country Fixed Effects, Personality Scores and Gender as Covariates

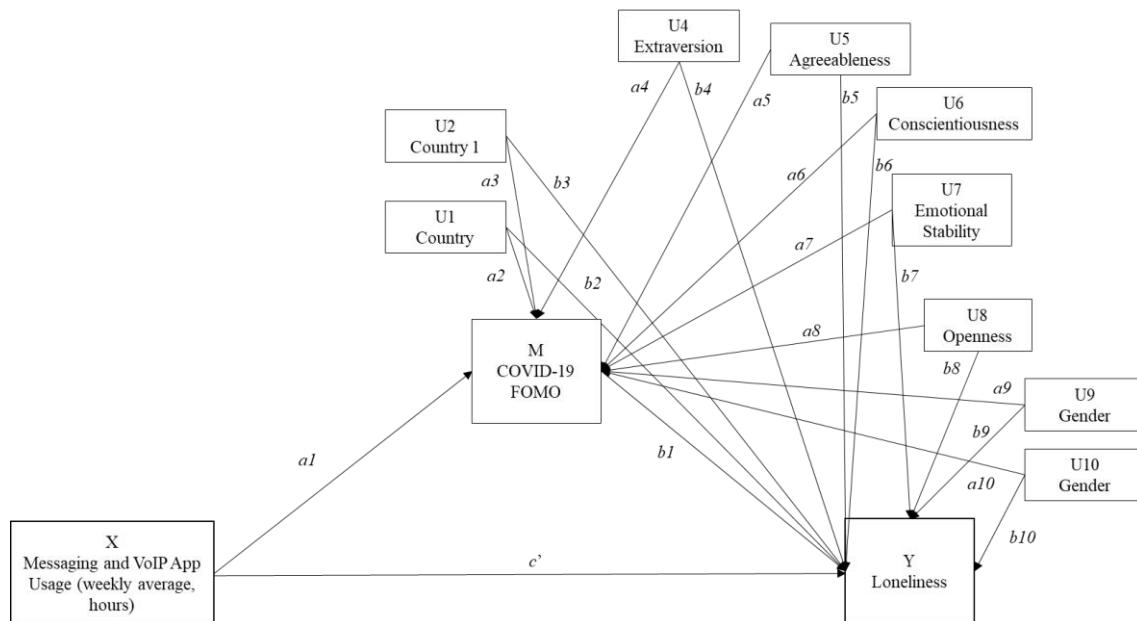

### Model Results

#### MEDIATION RESULTS

| Model-Path Estimates |              |              |               |              |
|----------------------|--------------|--------------|---------------|--------------|
|                      | Coefficient  | SE           | z             | p            |
| a1                   | -.012        | .007         | 1.800         | .072         |
| a2                   | .076         | .121         | .630          | .529         |
| <b>a3</b>            | <b>.418</b>  | <b>.1225</b> | <b>3.421</b>  | <b>.001</b>  |
| a4                   | .028         | .032         | .880          | .379         |
| a5                   | -.032        | .044         | -.724         | .469         |
| a6                   | -.036        | .038         | -.924         | .356         |
| <b>a7</b>            | <b>-.127</b> | <b>.031</b>  | <b>-4.061</b> | <b>.0000</b> |
| a8                   | .005         | .049         | .106          | .915         |
| a9                   | -.164        | .096         | -1.710        | .087         |
| <b>a10</b>           | <b>.985</b>  | <b>.397</b>  | <b>2.481</b>  | <b>.013</b>  |
| <b>b1</b>            | <b>.142</b>  | <b>.031</b>  | <b>4.572</b>  | <b>.0000</b> |
| b2                   | .116         | .069         | 1.697         | .090         |
| <b>b3</b>            | <b>.264</b>  | <b>.068</b>  | <b>3.867</b>  | <b>.0000</b> |
| <b>b4</b>            | <b>-.184</b> | <b>.020</b>  | <b>-9.368</b> | <b>.0000</b> |
| <b>b5</b>            | <b>-.065</b> | <b>.021</b>  | <b>-3.121</b> | <b>.002</b>  |
| b6                   | -.012        | .019         | -.638         | .534         |
| <b>b7</b>            | <b>-.109</b> | <b>.017</b>  | <b>-6.352</b> | <b>.0000</b> |
| b8                   | -.035        | .023         | -1.508        | .132         |
| b9                   | -.057        | .057         | -.996         | .319         |

|                                                                              |               |              |               |             |
|------------------------------------------------------------------------------|---------------|--------------|---------------|-------------|
| b10                                                                          | -.264         | .494         | -.534         | .593        |
| <b>c'</b>                                                                    | <b>-.0010</b> | <b>.0004</b> | <b>-2.313</b> | <b>.021</b> |
| Indirect Effect (with Bootstrap 95% Confidence Interval and Standard Errors) |               |              |               |             |
|                                                                              | Effect        | LL 95% CI    | UL 95% CI     | SE          |
| X → M → Y*                                                                   | .002          | .000         | .004          | .001        |

Note— 5,000 bootstraps. Bolded paths are significant; \*  $p = .111$

### Mediated Moderation Model - Self-Imposed Limits as Moderator (Exploratory Analyses)

Although we did not have an a priori hypothesis, we wanted to test whether having usage limits in place moderates the relationship between social media usage and FOMO. Previous research found that prompting participants to set limits for their social media usage does indeed reduce loneliness (Hunt et al., 2018). Thus, we tested whether the same effect holds for self-imposed (rather than researcher-imposed) limits, and if it applies to this specific pandemic context. Also, if limiting social networking apps reduces the negative consequences, it would suggest a possible actionable intervention to help people manage the negative effects of social network usage during this pandemic.

To test this possibility, we conducted a moderated mediation analysis (see results below). Contrary to what previous research has suggested, we found no significant interaction between social media usage and self-imposed limits on FOMO, and the overall indirect effect on loneliness was not moderated by self-imposed limits, as the index of moderated mediation was not significant. Our results could be explained by the fact that limits can still be circumvented because on the iPhone the user can continue using the app after the set time passed by ignoring the time warning, or by the fact that only a very small number of participants set self-imposed limits.

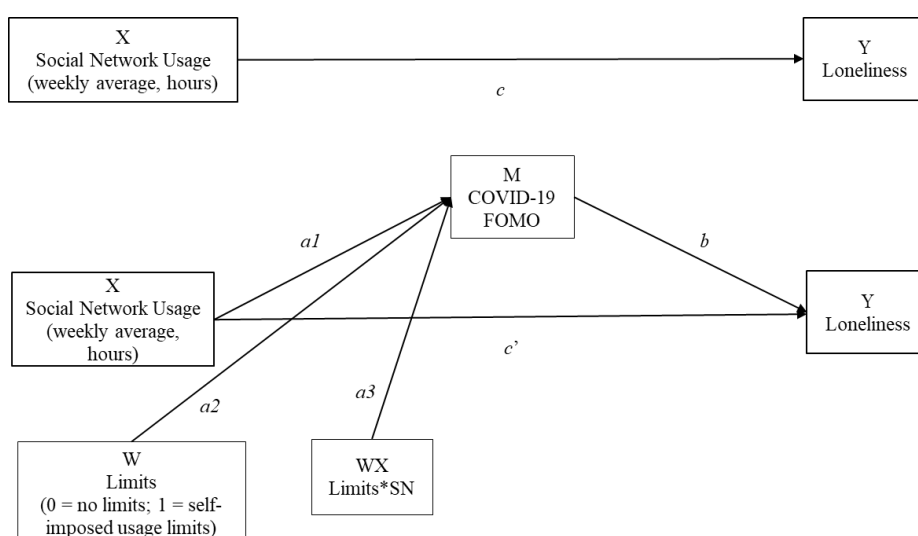

### Model Results

| Model-Path Estimates                                                         |             |             |              |             |
|------------------------------------------------------------------------------|-------------|-------------|--------------|-------------|
|                                                                              | Coefficient | SE          | <i>z</i>     | <i>p</i>    |
| <b>a1</b>                                                                    | <b>.012</b> | <b>.004</b> | <b>2.836</b> | <b>.005</b> |
| a2                                                                           | .220        | .136        | 1.618        | .106        |
| a3                                                                           | .009        | .010        | 0.909        | .364        |
| <b>b</b>                                                                     | <b>.196</b> | <b>.042</b> | <b>4.653</b> | <b>.000</b> |
| c'                                                                           | .003        | .003        | .779         | .436        |
| Indirect Effect (with Bootstrap 95% Confidence Interval and Standard Errors) |             |             |              |             |
|                                                                              | Effect      | LL<br>95%CI | UL 95%<br>CI | SE          |
| X → M → Y                                                                    |             |             |              |             |
| <b>Without limits</b>                                                        | <b>.002</b> | <b>.001</b> | <b>.005</b>  | <b>.001</b> |
| <b>With limits</b>                                                           | <b>.004</b> | <b>.001</b> | <b>.009</b>  | <b>.002</b> |
| Index of mediated moderation                                                 |             |             |              |             |
|                                                                              | Index       | LL<br>95%CI | UL 95%<br>CI | SE          |
|                                                                              | .002        | -.002       | .006         | .002        |
| <i>Note</i> — 5,000 bootstraps. Bolded paths are significant.                |             |             |              |             |

## Mediation Model – Single Apps as Predictors (Exploratory Analyses)

In the main manuscript, we used total social network usage as the predictor variable. However, we were also interested in examining whether the relations between smartphone usage, FOMO, and loneliness depend on the specific app used.

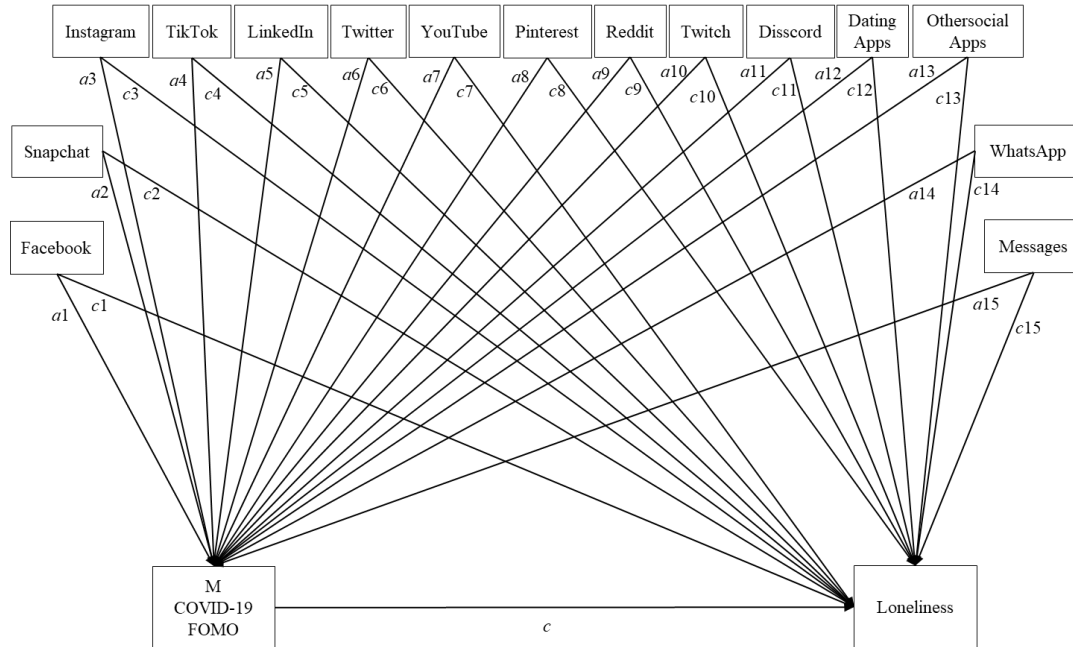

## Model Results

| Model-Path Estimates |             |             |              |             |
|----------------------|-------------|-------------|--------------|-------------|
|                      | Coefficient | SE          | z            | p           |
| a1                   | .020        | .012        | 1.602        | .109        |
| a2                   | .015        | .011        | 1.296        | .195        |
| <b>a3</b>            | <b>.015</b> | <b>.007</b> | <b>2.245</b> | <b>.025</b> |
| a4                   | .013        | .011        | 1.167        | .243        |
| a5                   | -.015       | .271        | -.054        | .957        |
| a6                   | .023        | .015        | 1.463        | .143        |
| a7                   | -.014       | .010        | -1.471       | .141        |
| a8                   | .340        | .250        | 1.357        | .175        |
| a9                   | -.026       | .055        | -.465        | .642        |
| a10                  | .031        | .046        | .670         | .503        |
| a11                  | -.011       | .096        | -.120        | .905        |
| a12                  | .094        | .142        | .663         | .507        |
| a13                  | -.017       | .040        | -.427        | .670        |
| a14                  | -.010       | .008        | -1.333       | .182        |

|            |              |             |               |             |
|------------|--------------|-------------|---------------|-------------|
| a15        | .008         | .040        | .201          | .840        |
| <b>b</b>   | <b>.196</b>  | <b>.041</b> | <b>4.780</b>  | <b>.000</b> |
| c1         | -.007        | .009        | .788          | .431        |
| c2         | -.008        | .008        | -.981         | .326        |
| c3         | -.006        | .005        | -1.171        | .242        |
| c4         | -.006        | .009        | -.666         | .506        |
| c5         | -.267        | .181        | -1.471        | .141        |
| c6         | -.006        | .008        | -.767         | .443        |
| <b>c7</b>  | <b>.013</b>  | <b>.006</b> | <b>2.014</b>  | <b>.044</b> |
| c8         | .031         | .239        | .129          | .897        |
| c9         | .022         | .043        | .518          | .605        |
| <b>c10</b> | <b>.089</b>  | <b>.036</b> | <b>2.495</b>  | <b>.013</b> |
| c11        | .014         | .040        | 0.349         | .727        |
| c12        | .004         | .085        | .045          | .964        |
| c13        | .018         | .025        | .739          | .460        |
| <b>c14</b> | <b>-.025</b> | <b>.006</b> | <b>-4.445</b> | <b>.000</b> |
| c15        | -.025        | .044        | -.569         | .569        |
| c          | -.054        | .321        | -.168         | .867        |
| c'         | -.145        | .327        | -.443         | .658        |

---

Indirect Effects (with Bootstrap 95% Confidence Interval and Standard Errors)

---

|                           | Effect      | LL<br>95% CI | UL 95%<br>CI | SE          |
|---------------------------|-------------|--------------|--------------|-------------|
| Facebook → M → Y          | .004        | -.001        | .010         | .003        |
| Snapchat → M → Y          | .003        | -.001        | .008         | .002        |
| <b>Instagram → M → Y</b>  | <b>.003</b> | <b>.000</b>  | <b>.006</b>  | <b>.001</b> |
| TikTok → M → Y            | .002        | -.002        | .007         | .002        |
| LinkedIn → M → Y          | -.003       | -.101        | .120         | .054        |
| Twitter → M → Y           | .004        | -.001        | .012         | .003        |
| YouTube → M → Y           | -.003       | -.007        | .001         | .002        |
| Pinterest → M → Y         | .067        | -.008        | .201         | .050        |
| Reddit → M → Y            | -.005       | -.023        | .023         | .011        |
| Twitch → M → Y            | .006        | -.006        | .028         | .009        |
| Discord → M → Y           | -.002       | -.041        | .037         | .019        |
| Dating Apps → M → Y       | .018        | -.025        | .089         | .029        |
| Other Social Apps → M → Y | -.003       | -.020        | .013         | .008        |



|                      |       |       |      |      |
|----------------------|-------|-------|------|------|
| WhatsApp → M → Y     | -.002 | -.006 | .001 | .001 |
| iOS Messages → M → Y | .002  | -.012 | .020 | .008 |

*Note*— 5,000 bootstraps. Bolded paths are significant.

## US lockdown enforcement

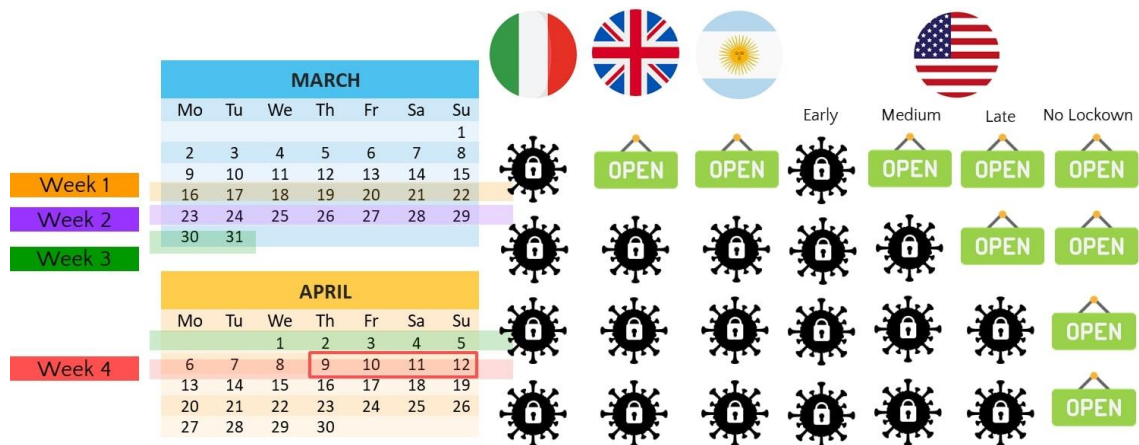

## Secondary Data on Mobility

Secondary data on mobility (<https://www.google.com/covid19/mobility/>) suggests that when we collected our data (March – April 2020), all our participants from Argentina, Italy and UK, were under stringent lockdown protocols and did comply with such protocols. As such we believe that the first lockdown wave was the perfect setting for us to study the effect of lockdown enforcement on social network use and its consequences. Compliance clearly declined later in the year, but also lockdown measures were less stringent and many activities remained available for people to gather safely.

## How did the number of visitors change since the beginning of the pandemic?, United Kingdom

Our World  
in Data

This data shows how community movement in specific locations has changed relative to the period before the pandemic.

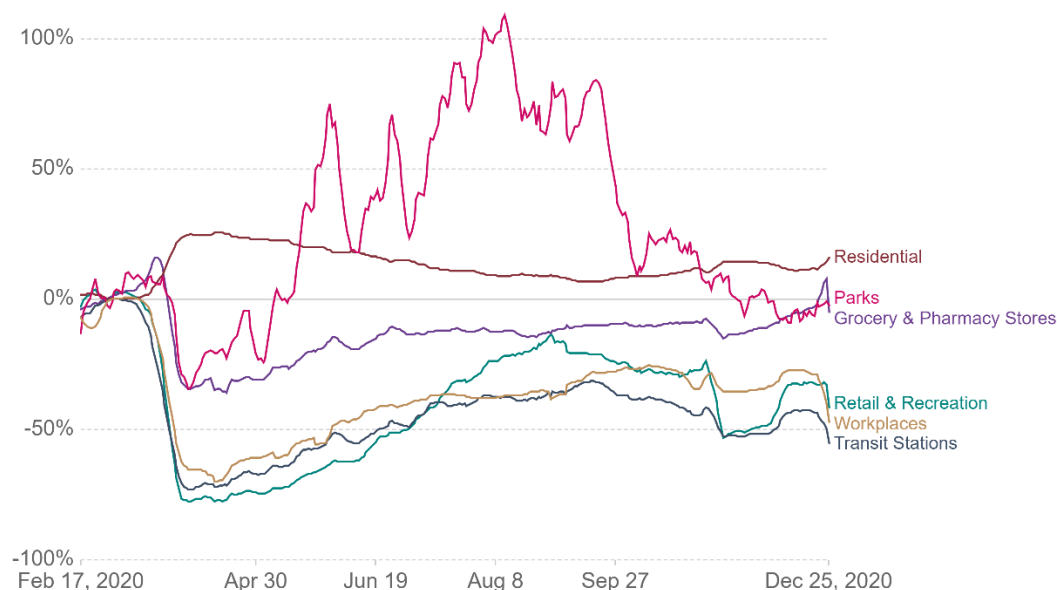

Source: Google COVID-19 Community Mobility Trends – Last updated 28 December, 19:02 (London time)

Note: It's not recommended to compare levels across countries; local differences in categories could be misleading.

OurWorldInData.org/coronavirus • CC BY

## How did the number of visitors change since the beginning of the pandemic?, Italy

Our World  
in Data

This data shows how community movement in specific locations has changed relative to the period before the pandemic.

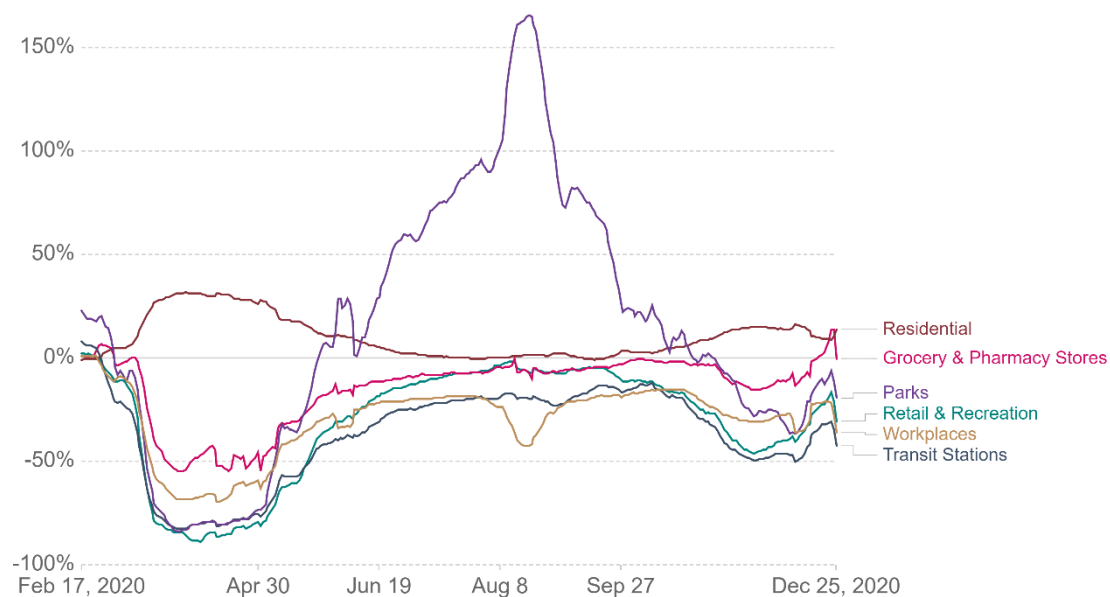

Source: Google COVID-19 Community Mobility Trends – Last updated 28 December, 19:02 (London time)

Note: It's not recommended to compare levels across countries; local differences in categories could be misleading.

OurWorldInData.org/coronavirus • CC BY

## How did the number of visitors change since the beginning of the pandemic?, Argentina

Our World  
in Data

This data shows how community movement in specific locations has changed relative to the period before the pandemic.

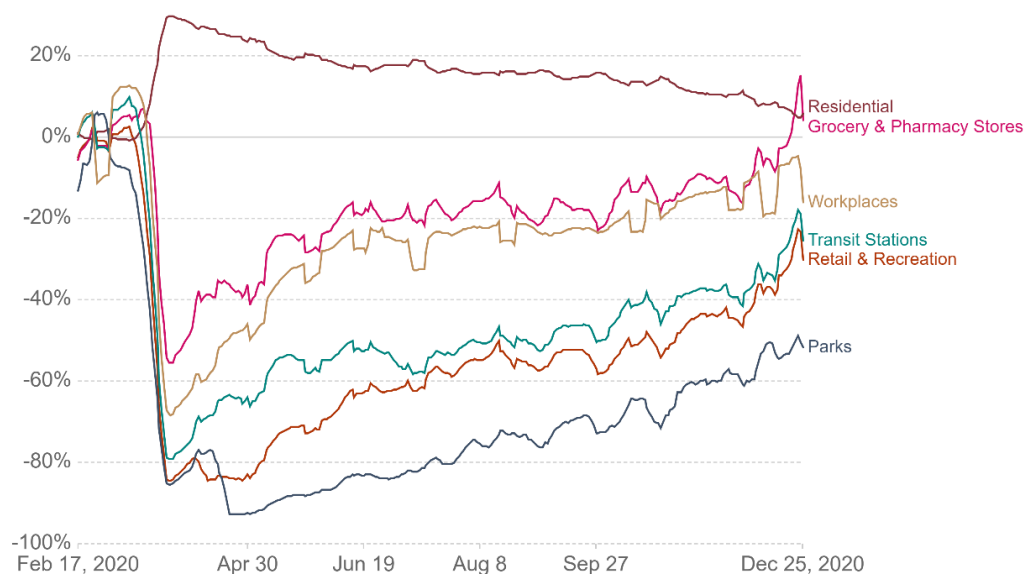

Source: Google COVID-19 Community Mobility Trends – Last updated 28 December, 19:02 (London time)

Note: It's not recommended to compare levels across countries; local differences in categories could be misleading.  
OurWorldInData.org/coronavirus • CC BY

## How did the number of visitors change since the beginning of the pandemic?, United States

Our World  
in Data

This data shows how community movement in specific locations has changed relative to the period before the pandemic.

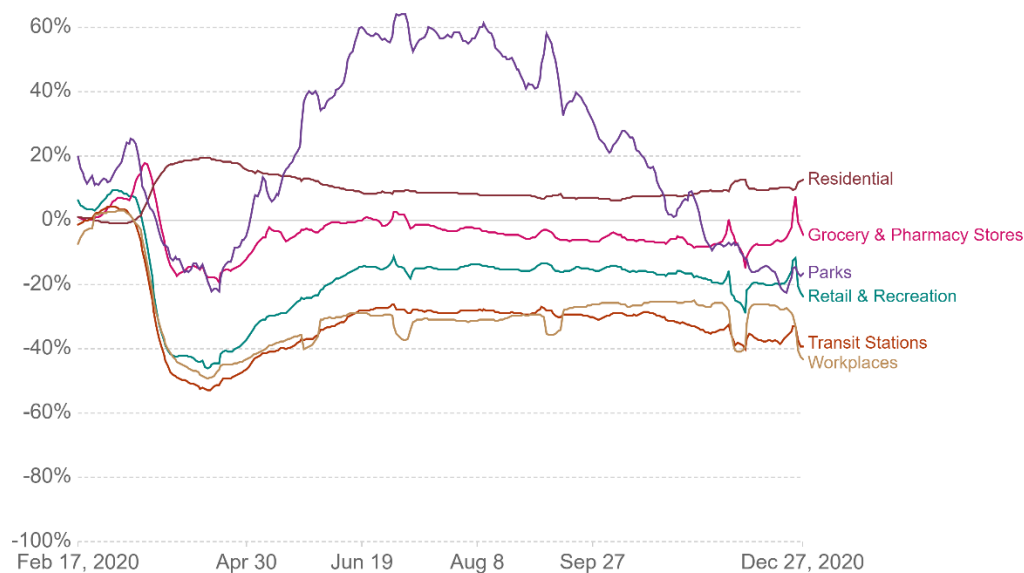

Source: Google COVID-19 Community Mobility Trends – Last updated 30 December, 20:00 (London time)

Note: It's not recommended to compare levels across countries; local differences in categories could be misleading.  
OurWorldInData.org/coronavirus • CC BY

Sources:

<https://www.google.com/covid19/mobility/>

<https://ourworldindata.org/covid-mobility-trends>
